# Supplementary material
Source: publisher site journal article supplement (https://www.dovepress.com/article/447249)
Supplement: Supplementary file 1 [file get_supplementary_file.php]

**Integrated Clinical Pathway**

**for Mild CS in Class C Hospital**

Medical Record Number : Wieght :

Name : Height :

Date Birth/Age : Admission Diagnosis :

Address : ICD CODE : ICD CODE :

Room : ICD CODE :

Doctor in Charge : ICD CODE :

Adm Date/Time : …………………………………./……..…….. Pre Op Diagnosis : ………………………………

Exit Date/Time : ……………………………….../………….…. Associated Treatment : …………………….………..

Treatment Plan : 3 Days Treatment Class : ………………………………

Direct Cost : US$ 155.86

Indirect Cost : US$ 124.67

| **SERVICE ACTIVITIES** | **DESCRIPTION OF ACTIVITIES** | **TIME** | **DAYS** | | | **VARIANCE** | **COST** | | **EXP** |
| --- | --- | --- | --- | --- | --- | --- | --- | --- | --- |
| **1** | **2** | **3** | **DC (US$)** | **IDC (US$)** |
| REGIS-TRATION | Accept patients and families with a smile and greetings | 19 | √ |  |  |  | 157.59 | 1.22 |  |
| Officers fill out medical record files by conducting interviews with patients regarding the desired place/facility and health insurance | √ |  |  |  |
| Check/find the location of the desired facility | √ |  |  |  |
| The officer asks if the patient requests other facilities or treatment | √ |  |  |  |
| The officer asks whether the patient agrees with the facilities according to the patient's request, if she agrees the patient fills out the consent form | √ |  |  |  |

| **SERVICE ACTIVITIES** | **DESCRIPTION OF ACTIVITIES** | **TIME** | **DAYS** | | | **VARIANCE** | **COST** | | **EXP** |
| --- | --- | --- | --- | --- | --- | --- | --- | --- | --- |
| **1** | **2** | **3** | **DC(US$)** | **IDC(US$)** |
| ASSESSMENT AND EDUCATION | **Assesment** | 30 |  | | | | 155.86 | 3.76 |  |
| Record identity, date and time | √ |  |  |  |
| The officer conducts an anamnesis including at least complaints and medical history | √ |  |  |  |
| Officers carry out physical examinations and medical support | √ |  |  |  |
| The officer makes a diagnosis and management plan, treatment and or action | √ |  |  |  |
| **Early Education** |  |  |  |  |
| The officer provides information about the flow of services that will be passed by the patient | √ |  |  |  |
| The officer guides the patient to their destination by giving them a folder with educational materials and instructions to hand it over to the officer when they reach their destination. | √ |  |  |  |
| **Education/Preparation for Going Home** |  |  | √ |  |
| Exclusive breastfeeding |  |  | √ |  |
| Breastfeeding position |  |  | √ |  |
| Injury cure |  |  | √ |  |
| Sex education |  |  | √ |  |
| Contraception |  |  | √ |  |
| How to take medicine at home |  |  | √ |  |
| Control schedule |  |  | √ |  |

| **SERVICE ACTIVITIES** | **DESCRIPTION OF ACTIVITIES** | **TIME** | **DAYS** | | | **VARIANCE** | **COST** | | **EXP** |
| --- | --- | --- | --- | --- | --- | --- | --- | --- | --- |
| **1** | **2** | **3** | **DC(US$)** | **IDC(US$)** |
| LABORATORY | The officer requests a laboratory examination and enters the request into the computer | 35 | √ |  |  |  | 155.86 | 2.64 | Hb, Leukocyte, Thrombocyte  Blood type, Rhesus,  GDR,  Urine routine  CT/BT |
| The officer takes the specimen, labels it, records it in the sample register book | √ |  |  |
| Analyst in laboratory examination room. Perform sample preparation | √ |  |  |
| The analyst analyzes (examines) the specimen, performs checks and rechecks, documents the results of the analysis | √ |  |  |
| Lab technician delivers lab results | √ |  |  |
|  |  |  |  |

| **SERVICE ACTIVITIES** | **DESCRIPTION OF ACTIVITIES** | **TIME** | **DAYS** | | | **VARIANCE** | **COST** | | **EXP** |
| --- | --- | --- | --- | --- | --- | --- | --- | --- | --- |
| **1** | **2** | **3** | **DC(US$)** | **IDC(US$)** |
| PRE OPERATION | The officer takes the patient's history by asking about the history of antenatal care, history of previous pregnancies and other conditions indicated to look for indications and contraindications | 45 | √ |  |  |  | 155.86 | 2.02 |  |
| Officers require patients to fast before carrying out a cesarean section for at least 8 hours preoperatively for solid food and 2 hours for liquid food | √ |  |  |  |
| Officers perform informed consent before carrying out cesarean section (CS) | √ |  |  |  |
| Officers perform intravenous access, foley catheters and anesthesia consultations to see if the patient is fit for surgery | √ |  |  |  |
| Officers administer prophylactic antibiotics to patients | √ |  |  |  |

| **SERVICE ACTIVITIES** | **DESCRIPTION OF ACTIVITIES** | **TIME** | **DAYS** | | | **VARIANCE** | **COST** | | **EXP** |
| --- | --- | --- | --- | --- | --- | --- | --- | --- | --- |
| **1** | **2** | **3** | **DC(US$)** | **IDC(US$)** |
| ANESTHESIA | Officers prepare equipment and patients | 70 | √ |  |  |  | 155.86 | 2.80 |  |
| Officers prepare equipment and medicines for spinal anesthesia (bupivacaine) | √ |  |  |  |
| Officers prepare syringes 3 cc, 5 cc, 10 cc as needed | √ |  |  |  |
| The officer prepares the installation of monitors (tension, pulse and oxygen saturation) | √ |  |  |  |
| Officers check the availability of O2 gas | √ |  |  |  |
| Officers prepare resuscitation equipment and drugs (such as atropine sulfate, epinephrine, ephedrine) | √ |  |  |  |
| Officers prepare medical record documentation | √ |  |  |  |
| Officers prepare ambu bag / positive pressure ventilation | √ |  |  |  |
| Officers prepare drugs and tools for epidural anesthesia and general anesthesia as an alternative if spinal anesthesia fails | √ |  |  |  |
| Officers prepare resuscitation equipment and drugs (such as atropine sulfate, epinephrine, ephedrine) | √ |  |  |  |
| The officer adjusts the patient's position and attaches the monitor | √ |  |  |  |
| Officers perform spinal anesthesia with an aseptic process | √ |  |  |  |
| Officers monitor while the patient is under anesthesia | √ |  |  |  |
| Officers provide oxygen when needed | √ |  |  |  |
| Officers monitor and record in the medical record | √ |  |  |  |
| Officers monitor the patient until the operation is complete and the patient is monitored after anesthesia with a bromage score |  | √ |  |  |  |
| if the patient is conscious, hemodynamically stable and can move the lower extremities (according to Brogmage score) after that the patient can return to the room | √ |  |  |  |
| The officers tidy up the tools after performing anesthesia | √ |  |  |  |

| **SERVICE ACTIVITIES** | **DESCRIPTION OF ACTIVITIES** | **TIME** | **DAYS** | | | **VARIANCE** | **COST** | | **EXP** |
| --- | --- | --- | --- | --- | --- | --- | --- | --- | --- |
| **1** | **2** | **3** | **DC(US$)** | **IDC(US$)** |
| INTRA OPERATION | **ASEPTIC-ANTISEPTIC MEASURES** | 30 |  | | |  | 155.86 | 4.56 |  |
| The operating field was cleaned with betadine | √ |  |  |  |
| The operating field is covered with a cloth | √ |  |  |  |
| **LAPAROTOMY** | √ |  |  |  |
| 10-15 cm skin incision | √ |  |  |  |
| Opening the fascia layer by making a small transverse incision with a scalpel and widening it with fascia scissors | √ |  |  |  |
| The operator opens the layers of the rectus muscle bluntly apart | √ |  |  |  |
| The operator opens the peritoneal cavity bluntly with a finger. The opening made must be ensured adequate for access to the uterus | √ |  |  |  |
| **HYSTEROTOMY** |  |  |  |  |
| The operator makes an initial incision with a scalpel transversely or vertically | √ |  |  |  |
| The operator separates the vesicouterine serosa and the myometrium of the lower uterine segment bluntly by inserting scissors and assisting laterally on both sides. | √ |  |  |  |
| The operator separates the bladder and myometrium by blunt dissection of the space between the bladder | √ |  |  |  |
| The operator performs a myometrial incision with Allis clamps | √ |  |  |  |
| The operator performs a 1-2 cm uterine incision in the midline and transverse to the bottom of the uterus (Monroe-Kerr) | √ |  |  |  |
| After access to the uterine cavity is obtained, the operator performs a hysterotomy incision which can be dilated bluntly with the operator's hand or gauze scissors. | √ |  |  |  |
| The operator performs a transversely dilated uterine incision by pulling vertically in a cephalocaudal direction with both index fingers. | √ |  |  |  |
| **LABOR** |  |  |  |  |
| The operator slides a hand into the uterine cavity between the symphysis and the baby's head to remove the head | √ |  |  |  |
| The operator applies a transbadominal push on the fundus to expel the head | √ |  |  |  |
| The operator checks for the presence or absence of the umbilical cord | √ |  |  |  |
| Deliver the baby's head | √ |  |  |  |
| The operator delivers the posterior shoulder by applying gentle upward traction and continuing gentle outward traction until all parts of the baby's body are born. | √ |  |  |  |
| The operation carries out management of the umbilical cord by examining the umbilical cord and clamping it with clamps at 2 points | √ |  |  |  |
| The operator cuts the cord between the two clamps | √ |  |  |  |
| The operation carries out management of the umbilical cord by examining the umbilical cord and clamping it with clamps at 2 points | √ |  |  |  |
| The operator cuts the cord between the two clamps | √ |  |  |  |
| The operator's assistant gave 10 IU oxytocin | √ |  |  |  |
| The operator removed the placenta with PTT after cutting the cord and administering oxytocin | √ |  |  |  |
| **UTERUS REPAIR** |  |  |  |  |
| Make sure no network is left behind | √ |  |  |  |
| The operator performs uterine reapproximation and closes the hysterotomy incision including closing the uterine and mymetrial incisions by performing continuous or interrupted suturing techniques with 2-0 chronic catgut suture or 1-0 or delayed-absorbable suture suture. | √ |  |  |  |
| **ABDOMEN CLOSURE** |  |  |  |  |  |  |
| The operator and assistant operator ensure that all surgical instruments are complete and nothing is left in the abdominal cavity | √ |  |  |  |
| The operator checks the organs and ensures that there is no injury to the organs | √ |  |  |  |
| The operator clears the blood and amniotic fluid by suctioning and irrigating | √ |  |  |  |
| The operator closed each abdominal lining successively and ensured the operating field was dry | √ |  |  |  |
| The operator positions the rectus abdominis muscle in position, if necessary, the operator performs 1 or 2 figure-of-eight sutures with 1-0 chromic suture. | √ |  |  |  |
|  | The operator closes the fascia layer by performing a simple-running sewing technique with a 1-0 or 2-0 delay-absorbable monofilament suture spacing and applying tension to the suture thread to prevent strangulation. | √ |  |  |  |
| The operator closes the subcutaneal layer with sutures that are more than 2 cm thick | √ |  |  |  |
| The operator covers the skin with subcuticular tissue with delayed-absorbable or non-absorbable 4-0 suture sutures. | √ |  |  |  |

| **SERVICE ACTIVITIES** | **DESCRIPTION OF ACTIVITIES** | **TIME** | **DAYS** | | | **VARIANCE** | **COST** | | **EXP** |
| --- | --- | --- | --- | --- | --- | --- | --- | --- | --- |
| **1** | **2** | **3** | DC(US$) | IDC(US$) |
| INFANT | Pediatricians and midwives / nurses in the delivery room / baby room ready in the operating room with resuscitation equipment | 10 | √ |  |  |  | 155.86 | 0.99 |  |
| Prepare resuscitation equipment, emergency medicines for neonates (mylon, dextrose 40%) | √ |  |  |  |
| Prepare dextrose 10% microburette infusion, IV catheter | √ |  |  |  |
| Prepare oxygen | √ |  |  |  |
| Turn on the infant warmers | √ |  |  |  |
| Prepare the slime sucker | √ |  |  |  |
| Prepare the umbilical cord | √ |  |  |  |
| After the baby is born, the baby is accepted to be positioned in an infant warmer, if the baby immediately cries (normal) care is given like a normal born baby | √ |  |  |  |

| **SERVICE ACTIVITIES** | **DESCRIPTION OF ACTIVITIES** | **TIME** | **DAYS** | | | **VARIANCE** | **COST** | | **EXP** |
| --- | --- | --- | --- | --- | --- | --- | --- | --- | --- |
| **1** | **2** | **3** | DC(US$) | IDC(US$) |
| POST OPERATION | Officers observe the patient closely by monitoring the airway, hemodynamics and cardiorespiratory stability until the patient can communicate again | 55 | √ |  |  |  | 155.86 | 3.52 |  |
|  | Officers carry out post-anesthesia routine observations every 30 minutes during the first 2 hours postoperatively continued every 1 hour or so until the patient is stable | √ |  |  |  |

| **SERVICE ACTIVITIES** | **DESCRIPTION OF ACTIVITIES** | **TIME** | **DAYS** | | | **VARIANCE** | **COST** | | **EXP** |
| --- | --- | --- | --- | --- | --- | --- | --- | --- | --- |
| **1** | **2** | **3** | DC(US$) | IDC(US$) |
| MOTHER CARE | Officers perform wound care by changing bandages 24 hours after SC, monitoring symptoms of fever and other signs of infection and checking wound separation or dehiscence | 30 | √ | √ | √ |  | 155.86 | 38.26 |  |
| The officer helps the patient to carry out the initial mobilization by tilting to the left and right and continuing to remove the catheter. If the patient experiences urinary retention in the first 6 hours, then the use of the catheter is extended 12-24 hours postoperatively, otherwise the catheter can be removed 12-24 hours postoperatively | √ | √ | √ |  |
| l Staff educate patients on deep vein thrombosis (DVT) prophylaxis and monitor lochia | √ | √ | √ |  |
| The officer notifies the patient to return to the doctor for control within 4-6 weeks after surgery | √ | √ | √ |  |

| **SERVICE ACTIVITIES** | **DESCRIPTION OF ACTIVITIES** | **TIME** | **DAYS** | | | **VARIANCE** | **COST** | | **EXP** |
| --- | --- | --- | --- | --- | --- | --- | --- | --- | --- |
| **1** | **2** | **3** | DC(US$) | IDC(US$) |
| INFANT CARE | Prepare tools and rooms that are warm and clean | 27,5 | √ |  |  |  | 155.86 | 37.61 |  |
| Prepare complete baby clothes, clean and dry soft towels for babies | √ |  |  |  |
| Prepare eye drops / eye ointment | √ |  |  |  |
| Washing hands with soap and clean water | √ |  |  |  |
| Immediately dry the baby with a clean dry towel, and warm. Then put on a warm dry cloth, give the baby to the mother to hold on to her chest and give breast milk because it will help release the placenta | √ |  |  |  |
| EARLY BREASTFEEDING INITIATION a series of activities in which the baby immediately after birth and having cut the umbilical cord instinctively performs activities ending with finding the mother's nipple and then breastfeeding in the first hour of birth | √ |  |  |  |
| a) Provide a comfortable position for the mother | √ |  |  |  |
| b) Drying the baby's body with a soft towel immediately after birth without washing it first, let the natural fluids envelop the baby's skin | √ |  |  |  |
| c) Place the baby on the mother's chest in a prone position | √ |  |  |  |
| d) Letting the baby's skin come into contact with the mother's skin until the baby finds the mother's nipple and then arranges it | √ |  |  |  |
| e) Letting the baby move naturally looking for the mother's breast, don't point it towards one of the nipples, but make sure the baby is in a comfortable position to look for the mother's nipple | √ |  |  |  |
| f) Mothers who give birth by secio caesarean must also immediately come into contact with their babies after giving birth, which of course requires more effort |  | √ |  |  |  |  |  |
| Keep baby warm (give head cover to prevent baby from losing body heat | √ |  |  |  |
| Cutting and tying the umbilical cord |  |  |  |  |
| Check the cut umbilical cord to make sure there is no bleeding | √ |  |  |  |
| Cover the umbilical cord with dry gauze | √ |  |  |  |
| Complete baby birth certificate | √ |  |  |  |
| After 5 minutes evaluate the general condition of the baby | √ |  |  |  |
| Perform a physical examination of the baby | √ | √ | √ |  |
| l Measuring the baby's vital signs, first measure with a thermometer placed in the armpit or groin of the thermometer | √ | √ | √ |  |
| Put on baby clothes and cover the baby | √ | √ | √ |  |
|  | Giving the baby to the mother to breastfeed immediately after birth no later than the first 2 hours | √ | √ | √ |  |  |
| Make sure the baby stays wrapped/wearing warm clothes and headgear | √ | √ | √ |  |
| Help the mother to breastfeed the baby | √ | √ | √ |  |
| Washing hands |  |  |  |  |
| Watch for urine and meconium discharge | √ | √ | √ |  |
| Record everything found on the mother and baby cards and collaborate if there are abnormalities | √ | √ | √ |  |

| **SERVICE ACTIVITIES** | **DESCRIPTION OF ACTIVITIES** | **TIME** | **DAYS** | | | **VARIANCE** | **COST** | | **EXP** |
| --- | --- | --- | --- | --- | --- | --- | --- | --- | --- |
| **1** | **2** | **3** | DC(US$) | IDC(US$) |
| NUTRITION CARE | The nutrition officer conducts a nutritional assessment by taking the patient's nutritional history | 52,5 | √ | √ | √ |  | 155.86 | 4.00 |  |
| Nutrition officers carry out laboratory tests and other examinations related to nutritional status, metabolic status and descriptions of organ functions that influence the emergence of patient nutritional problems | √ | √ | √ |  |
| Nutrition officers carry out anthropometric examinations on patients |  |  |  |  |
| Nutrition officers carry out physical examinations to detect clinical abnormalities related to nutritional disorders or can cause nutritional problems | √ | √ | √ |  |
| The nutrition officer asks the patient's personal history consisting of a history of drugs / supplements that are often consumed, socio-cultural, disease and general patient data | √ | √ | √ |  |
| The nutritionist performs a nutritional diagnosis | √ | √ | √ |  |
| Nutrition officers intervene and implement nutrition in patients | √ | √ | √ |  |
| The nutrition officer monitors and evaluates the patient's nutrition. If the patient has achieved the intended nutritional status, the officer will invite the patient to go home | √ | √ | √ |  |

| **SERVICE ACTIVITIES** | **DESCRIPTION OF ACTIVITIES** | **TIME** | **DAYS** | | | **VARIANCE** | **COST** | | **EXP** |
| --- | --- | --- | --- | --- | --- | --- | --- | --- | --- |
| **1** | **2** | **3** | DC(US$) | IDC(US$) |
| LAUNDRY | **Linen Collection** | 460 | √ |  |  |  | 155.86 | 12.66 |  |
| When taking linen in the room, a selection is made between infectious linen and non-infectious linen. | √ |  |  |  |
| Separate infectious linen and non-infectious linen into the space provided |  |  |  |  |
| **Linen Transport** | √ |  |  |  |
| Transportation of Linen from each Room, Inpatient and Installation is carried out by Laundry officers and must use PPE | √ |  |  |  |
| Recording, and handing over linen to the room clerk by filling out the dirty linen handover form | √ |  |  |  |
| Dirty linen that has been put into the Trolley is taken directly to the laundry | √ |  |  |  |
| **Linen Weighing** | √ |  |  |  |
| Weigh and record the amount of dirty linen received | √ |  |  |  |
| Perform selection of infectious and non-infectious linen | √ |  |  |  |
| Determine the selection of linen to determine the weight or not of the dirt | √ |  |  |  |
| Dirty linen may not be placed on the floor, must be put directly into the trolley and immediately taken to the laundry to be washed |  |  |  |  |
| **Linen Washing** | √ |  |  |  |
| For infectious linen, initial rinsing is carried out, then soaked with disinfectant in the soaking tub | √ |  |  |  |
| Do a final rinse and put it in the washing machine to wash it | √ |  |  |  |
| Non-infectious linen is washed immediately, while infectious linen needs to be soaked first |  | √ |  |  |  |  |  |
| The linen washer always uses PPE |  |  |  |  |
| **Linen Drying** | √ |  |  |  |
| Put linen that has been washed and dried in a tumble dryer into a clean trolley to be dried in a drying area | √ |  |  |  |
| The dry linen is lifted and put into a clean trolley to be taken to the ironing room | √ |  |  |  |
| Staff always use PPE | √ |  |  |  |
|  | **Linen Sequestration** | √ |  |  |  |  |
| After the linen is dry, iron it immediately | √ |  |  |  |
| After ironing, the linen is separated according to each room | √ |  |  |  |
| Staff always use PPE | √ |  |  |  |
| **Storage of Linens** |  |  |  |  |
| After being ironed and separated according to each room, the linen is temporarily stored in the cupboard before being distributed to each room | √ |  |  |  |
| **Linen Distribution** | √ |  |  |  |
| The packed linen is put into clean trolleys and distributed to each room | √ |  |  |  |
| Staff always use PPE | √ |  |  |  |

| **SERVICE ACTIVITIES** | **DESCRIPTION OF ACTIVITIES** | **TIME** | **DAYS** | | | **VARIANCE** | **COST** | | **EXP** |
| --- | --- | --- | --- | --- | --- | --- | --- | --- | --- |
| **1** | **2** | **3** | DC(US$) | IDC(US$) |
| STERILIZATION | **Reception of Instruments from the Room** | 83 | √ |  |  |  | 155.86 | 1.98 |  |
| Officers bring instruments / tools from the room to CSSD | √ |  |  |  |
| Instruments / tools are received by the CSSD officer at the reception counter |  |  |  |  |
| The condition of the instrument/equipment is checked and scrutinized by CSSD officers for completeness and integrity | √ |  |  |  |
| If there are instruments / tools that are damaged / worn out, the tools must be replaced and recorded in the CSSD book | √ |  |  |  |
| If there is a missing tool, a written report must be made by the head of the room | √ |  |  |  |
| Submission and acceptance of instruments / tools are recorded in the room expedition book by the room officer according to the number, then the CSSD officer checks if it is appropriate to give a clear signature and name | √ |  |  |  |
| The CSSD officer writes the number of instruments/equipment, the name of the delivery room, the name that submits to the receipt book. CSSD officers and room staff must include signatures and full names | √ |  |  |  |
| **Cleaning** | √ |  |  |  |
| ***a. Decontamination*** | √ |  |  |  |
| Dirty tools are separated according to type and then immersed in an enzymatic solution with a ratio of 25 mL to 5 L of water. Soaked for 5-15 minutes | √ |  |  |  |
| ***b. Washing and drying*** |  |  |  |  |
| Officers who wash tools wear PPE, including: plastic scort, masks, gloves, goggles (goggles) and footwear (boots) |  | √ |  |  |  |  |  |
| Manual washing by brushing the instrument and rinsing until clean | √ |  |  |  |
| **Identification of Sterilization Results** | √ |  |  |  |
| All packaged items to be sterilized must be marked with external indicators | √ |  |  |  |
| External indicators include the operator's identity, lot number, sterilization date and expiration date | √ |  |  |  |
| The expiration date for a lien is 3 days from the date of sterilization | √ |  |  |  |
| The expiration date for the instrument is 3 months from the date of sterilization | √ |  |  |  |
| The expiration date for tools that are not heat resistant (low temperature use) is 1 year | √ |  |  |  |
| If the packaging has passed the expiration date, it is necessary to have a product recall or recall for re-sterilization | √ |  |  |  |
|  | If the expiration date has not passed, the packaging is found to be damaged, holes or torn, then the tool/material is considered no longer sterile and a recall will be carried out. | √ |  |  |  |  |
| CSSD officers supervise the storage of stress products every month according to the time and officers adjust |  |  |  |  |

| **SERVICE ACTIVITIES** | **DESCRIPTION OF ACTIVITIES** | **TIME** | **DAYS** | | | **VARIANCE** | **COST** | | **EXP** |
| --- | --- | --- | --- | --- | --- | --- | --- | --- | --- |
| **1** | **2** | **3** | DC(US$) | IDC(US$) |
| PHARMACY CARE | **Prescription Screening** | 15 | √ |  |  |  | 155.86 | 1.59 |  |
| Check the completeness and validity of the prescription, namely the doctor's name, practice license number, address, date of writing the prescription, doctor's signature or initials as well as the name, address, age, gender and weight of the patient | √ |  |  |  |
| Carry out pharmaceutical suitability checks, namely for the form of availability, dosage, frequency, strength, stability, incompatibility, method and duration of drug administration |  |  |  |  |
| Assessing clinical aspects by conducting patient assessments on patients, namely allergies, side effects, interactions, suitability (dose, duration, number of drugs, and other special conditions), patient complaints and other matters related to clinical aspect studies. Patient assessment work instructions attached (for example: using the 3 prime question method) | √ |  |  |  |
| Determine whether DUS$ exists or not and make professional decisions (communication with doctors, referring patients to related health facilities, etc.) | √ |  |  |  |
| Communicating with the doctor about prescription problems when necessary | √ |  |  |  |
| **Preparation of Pharmaceutical Preparations** | √ |  |  |  |
| Prepare pharmaceutical preparations and medical devices according to prescription requests | √ |  |  |  |
| Calculate the suitability of the dose and not exceed the maximum dose | √ |  |  |  |
| Take medicine and carry it using gloves / tools / spatula / spoon |  | √ |  |  |  |  |  |
| Close the medicine container again after returning and returning it to its place (for tablets in cans) | √ |  |  |  |
| Record dispensing of drugs on the stock card |  |  |  |  |
| Prepare white labels for internal drugs or blue for external drugs | √ |  |  |  |
| Write the patient's name, prescription number, date of prescription, how to use as requested on the prescription, as well as instructions and other information | √ |  |  |  |
| **Submission of Pharmaceutical Preparations** | √ |  |  |  |
| Carry out a final inspection before submission (conformity between label writing and prescription) | √ |  |  |  |
| Make a copy of the prescription according to the original recipe and initialed by the Pharmacist | √ |  |  |  |
| Check the identity and address of the patient | √ |  |  |  |
| Submitting drugs accompanied by providing drug information | √ |  |  |  |
| Ask the patient to repeat the information that has been presented | √ |  |  |  |
| Keep recipes in place and document them | √ |  |  |  |
|  | Documenting all actions of pharmacists and PMR (patient medication record) | √ |  |  |  |  |
| Monitoring to patients about the success of therapy, side effects, etc. |  |  |  |  |

| **SERVICE ACTIVITIES** | **DESCRIPTION OF ACTIVITIES** | **OBSERVATION RESULTS** | **EXP** |
| --- | --- | --- | --- |
| OUTCOME | **Length of Stay**  The difference between the date of discharge (discharge from the hospital, whether alive or dead) and the date of admission to the hospital.   1. According to CP 2. Not suitable |  |  |
| **Postoperative pain**  Unpleasant sensory and emotional experience related to tissue damage or a tendency to impending tissue damage or a condition suggestive of tissue damage  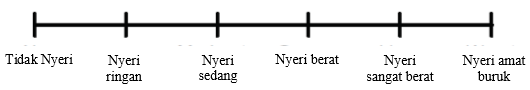  Severe pain  Mild pain  Moderate pain  Very bad pain  Very severe pain  No pain |  |  |
| **Surgical Wound Infection**  Infection of the surgical wound (the surgical wound is watery / festering, red, swollen and painful) that occurs within 30 days after the cesarean section operation |  |  |

**Direct COST Packages (DRUGS/CONSUMABLE MATERIALS/MEDICAL EQUIPMENT PACKAGES)**

1. SPINAL ANESTHESIA AND PAIN MANAGEMENT PACKAGE

| **No** | **MEDICAL CONSUMABLE/MEDICINE** | **supply** | **total/dose** | **EXPLANATION** |
| --- | --- | --- | --- | --- |
| 1. | Bupivakain / decain | ampoule | 1 |  |
| 2. | Ondansetron | ampoule | 1 |  |
| 4. | Spinal needle | no 27 | 1 |  |
| 5. | Spuit | 3 cc | 1 |  |
| 6. | spuit | 5 cc | 1 |  |
| 7. | pronalges | suppos | 3 |  |
| 8. | Ringer LaCTATE | 500 ml | 3 |  |
| 9. | NaCl | 500 ml | 1 |  |
| 10. | Sedacum | ampoule | 1 |  |

2. PREOPERATIVE PACKAGE

| **No** | **MEDICAL CONSUMABLE/MEDICINE** | **supply** | **total/dose** | **EXPLANATION** |
| --- | --- | --- | --- | --- |
| 1. | IV catheter | no 18 | 1 |  |
| 2. | Infus set |  | 1 |  |
| 3. | RL | 500 mL | 1 |  |
| 4. | D5 | 500 ml | 1 |  |
| 5. | Foley catHeter | no 18 | 1 |  |
| 6. | urine BAG |  | 1 |  |
| 7. | Under paD |  | 1 |  |
| 8 | Gentamicin | ampoule | 2 |  |
| 9 | spuit | 3 cc | 2 |  |

3. NORMAL BABY CARE PACKAGE

| **No** | **medical consumable /medicine** | **supply** | **total/dose** | **EXPLANATION** |
| --- | --- | --- | --- | --- |
| 1. | Umbilical clamp | set | 1 |  |
| 2. | Vit K1 | ampoule | 1 |  |
| 3. | spuit | 1 cc | 1 |  |

4. KALA III ACTIVE MANAGEMENT PACKAGE

| **No** | **medical consumable /MEDICINE** | **supply** | **total/dose** | **EXPLANATION** |
| --- | --- | --- | --- | --- |
| 1. | OXitoCYn | ampoule | 1 |  |
| 2. | Spuit | 3 cc | 1 |  |

5. OPERATING ROOM PACKAGE

| **No** | **medical consumable /MEDICINE** | **supply** | **total/dose** | **EXPLANATION** |
| --- | --- | --- | --- | --- |
| 1. | Vicryl No 1 | 90 cm | 1 |  |
| 2. | chromic n0 2 |  | 180 cm |  |
| 3. | plain no 2/0 |  | 90 cm |  |
| 4. | plain no 0 |  | 45 cm |  |
| 5. | betadine |  | 150 ml |  |
| 6. | kassa |  | 20 pcs |  |
| 7. | Sterile handschoon |  | 7 psg |  |
| 8. | dramcaas |  | 2 pcs |  |
| 9. | surgical mask |  | 7 pcs |  |
| 10. | surgical hat |  | 7 pcs |  |
| 11. | Leukomed t plus |  | 2 pcs |  |

6. INFECTION PREVENTION KIT

| **No** | **Medical consumable/MEDICINE** | **supply** | **total/dose** | **EXPLANATION** |
| --- | --- | --- | --- | --- |
| 1. | one scrub |  | 30 cc |  |
| 2. | CEFAZOLIN |  | 2 x 1 gram |  |
